# Supplementary material
Source: PubMed Central journal article supplement (PMC2584586)
Supplement: en.2008-0100_2.pdf [file en.2008-0100_2.pdf]

## **Supplemental Table**

**Table 1S: RT-PCR Primers**

Primers were designed to span at least one exon based on sequence data from GeneBank, were optimized using Primer3 ([http://frodo.wi.mit.edu/cgi-bin/primer3/primer3\\_www.cgi](http://frodo.wi.mit.edu/cgi-bin/primer3/primer3_www.cgi)), and synthesized by IDT (Integrated DNA Technologies, Inc., Coralville, IA).

| Gene Name      | Right primer            | Left primer             | Product (bp) |
|----------------|-------------------------|-------------------------|--------------|
| FATP1          | GCAGAAGACGCAGGAAGA      | GGACGTGGCTGTGTATGG      | 161          |
| FATP4          | CAAGAAGCGCAGGAAGATG     | GCAGATGTGGCAGTTTATGG    | 166          |
| UCP2           | CACCAACATTGAGCTTGCTTT   | GAGCCCTCAGCCCTTCTAC     | 108          |
| UCP3           | AAGCTCCCAGACGCAGAAA     | CCCGGTGGATGTGGTAAAG     | 149          |
| FABPpm         | ACTTGGTGACCTGGTGAATG    | CAGATCGGCATGTTCTGTTT    | 163          |
| CD36           | AGCACACACCACATTTCTT     | ATGGCCTTACTTGGGATTG     | 213          |
| MCAD           | GCTTCCACAATGAATCCAGTAAA | GAGTATGTTATCAACGGCCAGAA | 134          |
| PDK4           | TGTGGTGAAGGTGTGAAGGAA   | AGTCCAAGATGCCTTTGAGTG   | 143          |
| PPAR $\alpha$  | TCTTCTCGGCCATACACAAG    | CCACGAAGCCTACCTGAAGA    | 128          |
| PPAR $\delta$  | CTGCCACCATCTGGGTCT      | TCAGAGGCTCCTGCTCAC      | 82           |
| PGC1 $\alpha$  | TGGCTGGTGCCAGTAAGAG     | CGTGGATGAAGACGGATTG     | 158          |
| ESRR $\alpha$  | GGCGTACAGCTTCTCAGGTT    | TCAAGGAGGGTGTGCGTCT     | 197          |
| $\beta$ -actin | GGACTCATCGTACTCCTGCTT   | GAGATTACTGCTCTGGCTCCT   | 150          |
